# Supplementary material for: Natural coumarins as potential anti-SARS-CoV-2 agents supported by docking analysis
Source: PubMed Central journal article supplement — RSC Adv. 2021 May 7;11(28):16970–9. doi: 10.1039/d1ra01989a (PMC9032274; doi:10.1039/d1ra01989a), 2021-05-07
Supplement: RA-011-D1RA01989A-s001.pdf [file RA-011-D1RA01989A-s001.pdf]

## Supplementary Material

### Natural Coumarins as Potential anti-SARS-CoV-2 Agents Supported by Docking Analysis

**Usama Ramadan Abdelmohsen<sup>1,2</sup>, Amgad Albohy<sup>3</sup>, Basma S. Abdulrazik<sup>3</sup>, Soad A. L. Bayoumi<sup>4</sup>, Lourin G. Malak<sup>4</sup>, Iman S. A. Khallaf<sup>4</sup>, Gerhard Bringmann<sup>5,\*</sup>, Salwa F. Farag<sup>4,6,\*</sup>**

<sup>1</sup> Department of Pharmacognosy, Faculty of Pharmacy, Minia University, Minia 61519, Egypt; Usama.ramadan@mu.edu.eg

<sup>2</sup> Department of Pharmacognosy, Faculty of Pharmacy, Deraya University, 7 Universities Zone, 61111 New Minia City, Egypt

<sup>3</sup> Department of Pharmaceutical Chemistry, Faculty of Pharmacy, The British University in Egypt (BUE), El-Sherouk City, Suez Desert Road, Cairo 11837, Egypt; amgad.albohy@bue.edu.eg; basma.sabry@bue.edu.eg

<sup>4</sup> Pharmacognosy Department, Faculty of Pharmacy, Assiut University, Assiut 71526, Egypt; soad.bayoumi@pharm.aun.edu.eg; lourinmalak@aun.edu.eg; iman.khallaf@pharm.aun.edu.eg

<sup>5</sup> Institute of Organic Chemistry, University of Würzburg, Am Hubland, 97074 Würzburg, Germany

<sup>6</sup> Pharmacognosy Department, College of Pharmacy, Taif University, Taif, Saudi Arabia

\* Correspondence: farag\_s@yahoo.com); bringman@chemie.uni-wuerzburg.de

**Table S1.** A list of natural antiviral coumarins (**AV-1** - **AV-80**). The Table presents structures as shown in the primary literature, even if they may have been published without stereochemical details (like, e.g., for compound **AV-4** and others).

| No. | Compound                  | Source                                         | Structure                                                                             | Antiviral Activity                                                                                                  | Ref |
|-----|---------------------------|------------------------------------------------|---------------------------------------------------------------------------------------|---------------------------------------------------------------------------------------------------------------------|-----|
| 1   | Isoobtusitin              | <i>Psiadia dentate</i><br>F. Asteraceae        | 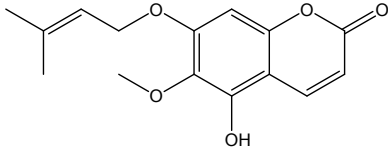    | Moderate inhibitory activity against poliovirus and a very weak activity against human immunodeficiency virus (HIV) | [1] |
| 2   | Collinin<br>(Schinifolin) | <i>Zanthoxylum schinifolium</i><br>F. Rutaceae |     | Activity against hepatitis B virus (HBV)<br>IC <sub>50</sub> = 17.1 μg/mL                                           | [2] |
| 3   | Claucavatin-A             | <i>Clausena excavata</i><br>F. Rutaceae        |   | Activity against HBV                                                                                                | [3] |
| 4   | Claucavatin-B             | <i>Clausena excavata</i><br>F. Rutaceae        |  | Activity against HBV                                                                                                | [3] |

|   |                                     |                                                     |                                                                                     |                                                                                 |       |
|---|-------------------------------------|-----------------------------------------------------|-------------------------------------------------------------------------------------|---------------------------------------------------------------------------------|-------|
|   |                                     |                                                     | "absolute configuration not given"                                                  |                                                                                 |       |
| 5 | Wedelolactone                       | <i>Wedelia calendulacea</i><br>F. Asteraceae        | 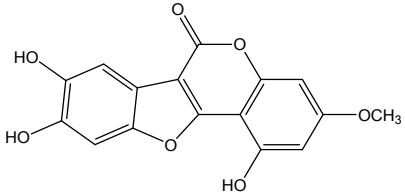  | Activity against hepatitis C virus<br>IC <sub>50</sub> = 36.1 μM                | [2,4] |
| 6 | Chalepin                            | <i>Ruta angustifolia</i><br>F. Rutaceae             |   | Activity against hepatitis C virus<br>IC <sub>50</sub> = 1.7 ± 0.5 μg/mL        | [2,4] |
| 7 | Glycyrol                            | <i>Glycyrrhiza uralensis</i><br>F. Fabaceae         |   | Activity against hepatitis C virus<br>IC <sub>50</sub> = 4.6 μg/mL              | [4]   |
| 8 | Eleutheroside B1                    | <i>Sarcandra glabra</i><br>F. Chloranthaceae        |  | Activity against influenza virus<br>IC <sub>50</sub> = 64–125 μg/mL             | [5]   |
| 9 | 8'-Acetoxy-5'S-hydroxyumbelliprenin | Gum resin of <i>Ferula asfoetida</i><br>F. Apiaceae |                                                                                     | Activity against influenza A (H1N1) virus<br>IC <sub>50</sub> = 0.26-0.86 μg/mL | [6]   |

|           |                  |                                                     |                                                                                      |                                                                   |     |
|-----------|------------------|-----------------------------------------------------|--------------------------------------------------------------------------------------|-------------------------------------------------------------------|-----|
|           |                  |                                                     | 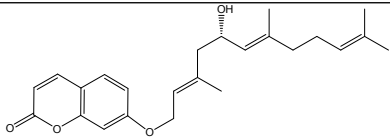   |                                                                   |     |
| <b>10</b> | Methyl galbanate | Gum resin of <i>Ferula asfoetida</i><br>F. Apiaceae |   | Activity against H1N1 virus<br>IC <sub>50</sub> = 0.26-0.86 µg/mL | [6] |
| <b>11</b> | Galbanic acid    | Gum resin of <i>Ferula asfoetida</i><br>F. Apiaceae |    | Activity against H1N1 virus<br>IC <sub>50</sub> = 0.26-0.86 µg/mL | [6] |
| <b>12</b> | Conferol         | Gum resin of <i>Ferula asfoetida</i><br>F. Apiaceae |  | Activity against H1N1 virus<br>IC <sub>50</sub> = 0.26-0.86 µg/mL | [6] |

|    |                |                                                     |                                                                                     |                                                                                       |     |
|----|----------------|-----------------------------------------------------|-------------------------------------------------------------------------------------|---------------------------------------------------------------------------------------|-----|
| 13 | Microlobidene  | Gum resin of <i>Ferula asfoetida</i><br>F. Apiaceae | 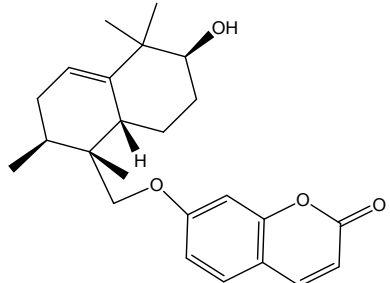  | Activity against <i>Herpes simplex</i> virus                                          | [6] |
| 14 | Farnesiferol B | Gum resin of <i>Ferula asfoetida</i><br>F. Apiaceae |   | Activity against <i>Herpes simplex</i> virus                                          | [6] |
| 15 | Farnesiferol C | Gum resin of <i>Ferula asfoetida</i><br>F. Apiaceae |   | Activity against <i>Herpes simplex</i> virus                                          | [6] |
| 16 | Kellerine      | Gum resin of <i>Ferula asfoetida</i><br>F. Apiaceae |  | Activity against <i>Herpes simplex</i> virus 1 (HSV-1)<br>EC <sub>50</sub> = 38 µg/mL | [2] |

|    |             |                                           |                                                                                     |                               |     |
|----|-------------|-------------------------------------------|-------------------------------------------------------------------------------------|-------------------------------|-----|
| 17 | Ramosin     | <i>Myrtopsis corymbosa</i><br>F. Rutaceae | 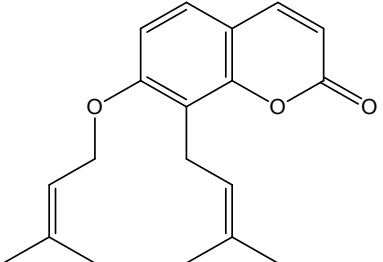  | Activity against dengue virus | [5] |
| 18 | Myrsellinol | <i>Myrtopsis corymbosa</i><br>F. Rutaceae |   | Activity against dengue virus | [5] |
| 19 | Myresellin  | <i>Myrtopsis corymbosa</i><br>F. Rutaceae |  | Activity against dengue virus | [5] |

|    |                                         |                                                                   |                                                                                       |                                                         |       |
|----|-----------------------------------------|-------------------------------------------------------------------|---------------------------------------------------------------------------------------|---------------------------------------------------------|-------|
| 20 | Coumarin A                              | <i>Mammea americana</i><br>F. Calophyllaceae                      | 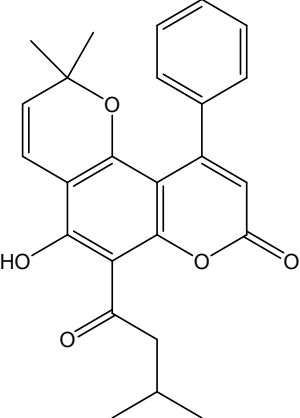    | Activity against dengue and chikungunya virus           | [4]   |
| 21 | Coumarin B                              | <i>Mammea americana</i><br>F. Calophyllaceae                      |    | Activity against dengue and chikungunya virus           | [4]   |
| 22 | Imperatorin<br>(Ammidin,<br>Marmelosin) | <i>Ferula sumbul</i> , <i>Prangos tschimganica</i><br>F. Apiaceae |  | Activity against HIV<br>EC <sub>50</sub> = < 0.10 µg/mL | [2,7] |

|    |                |                                                        |                                                                                      |                                                      |     |
|----|----------------|--------------------------------------------------------|--------------------------------------------------------------------------------------|------------------------------------------------------|-----|
| 23 | Isoimperatorin | <i>Ferula sumbul, Angelica apaensis</i><br>F. Apiaceae | 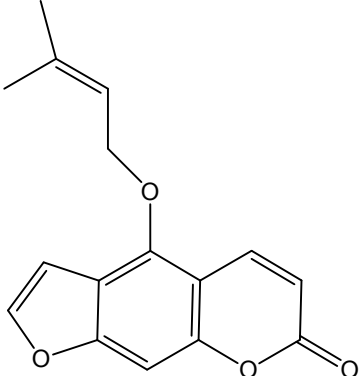  | Activity against HIV                                 | [4] |
| 24 | Oxypeucedanin  | <i>Ferula sumbul, Angelica apaensis</i><br>F. Apiaceae |  | Activity against HIV<br>EC <sub>50</sub> = 1.0 µg/mL | [4] |



|    |                                      |                                                                |                                                                                      |                                                     |     |
|----|--------------------------------------|----------------------------------------------------------------|--------------------------------------------------------------------------------------|-----------------------------------------------------|-----|
| 25 | Oxypeucedanin hydrate                | <i>Ferula sumbul</i> , <i>Angelica apaensis</i><br>F. Apiaceae | 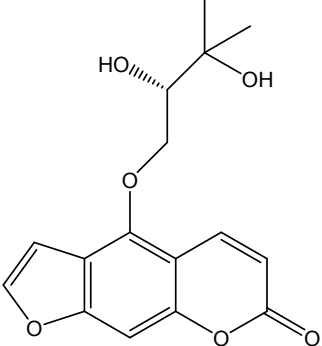  | Activity against HIV<br>EC <sub>50</sub> = 10 µg/mL | [4] |
| 26 | Gosferol<br>(Pabulenol;<br>Pangelin) | <i>Prangos ferulacea</i><br>F. Apiaceae                        |   | Activity against HIV                                | [8] |
| 27 | Pranpherol<br>(Pranferol)            | <i>Ferula sumbul</i><br>F. Apiaceae                            |  | Activity against HIV<br>(TI) > 5                    | [4] |

|    |                                         |                                                                                                                    |                                                                                      |                                                        |       |
|----|-----------------------------------------|--------------------------------------------------------------------------------------------------------------------|--------------------------------------------------------------------------------------|--------------------------------------------------------|-------|
| 28 | Heraclenol                              | <i>Ferula sumbul</i><br>F. Apiaceae                                                                                | 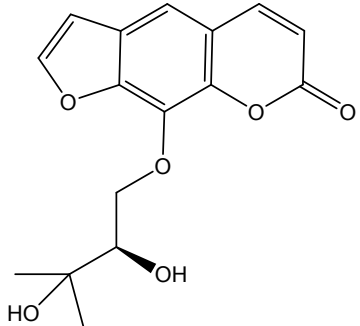  | Activity against HIV<br>EC <sub>50</sub> = 0.115 µg/mL | [2,4] |
| 29 | Glycycomarin                            | <i>Camellia sinensis</i><br>F. Theaceae,<br><i>Glycyrrhiza uralensis</i> ,<br><i>Xibei licorice</i><br>F. Fabaceae |    | Activity against HIV                                   | [2,4] |
| 30 | Licopyranocoumarin                      | <i>Camellia sinensis</i><br>F. Theaceae,<br><i>Glycyrrhiza uralensis</i> ,<br><i>Xibei licorice</i><br>F. Fabaceae |    | Activity against HIV                                   | [2,4] |
| 31 | 5,7-Dihydroxy-4-phenyl-8-prenylcoumarin | <i>Marila pluricostata</i><br>F. Calophyllaceae                                                                    |  | Activity against HIV<br>at 50 µM                       | [5]   |

|    |           |                                                 |                                                                                     |                                                     |     |
|----|-----------|-------------------------------------------------|-------------------------------------------------------------------------------------|-----------------------------------------------------|-----|
| 32 | Mesuol    | <i>Marila pluricostata</i><br>F. Calophyllaceae | 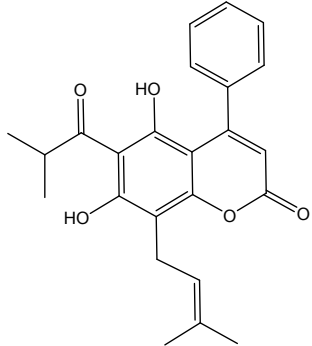 | Activity against HIV<br>IC <sub>50</sub> = 2-2.5 μM | [5] |
| 33 | Isomesuol | <i>Marila pluricostata</i><br>F. Calophyllaceae |   | Activity against HIV<br>IC <sub>50</sub> = 2-2.5 μM | [2] |

|    |                             |                                                 |                                                                                      |                                                                                            |     |
|----|-----------------------------|-------------------------------------------------|--------------------------------------------------------------------------------------|--------------------------------------------------------------------------------------------|-----|
| 34 | Disparinol A                | <i>Marila pluricostata</i><br>F. Calophyllaceae | 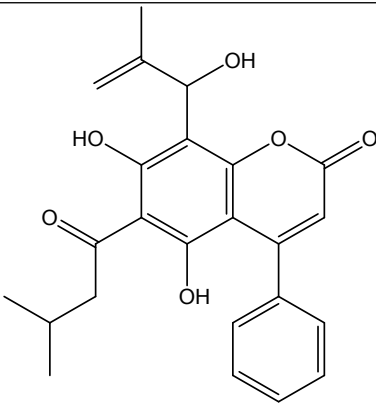   | Activity against HIV<br>IC <sub>50</sub> = 0.5 μM                                          | [9] |
| 35 | Isodispar B                 | <i>Marila pluricostata</i><br>F. Calophyllaceae |  | Activity against HIV<br>IC <sub>50</sub> = 6.9 μM.                                         | [9] |
| 36 | Esculetin<br>(Sichorigenin) | <i>Artemisia capillaris</i><br>F. Asteraceae    |  | Activity against HIV<br>ED <sub>50</sub> = 2.51 μg/mL and<br>therapeutic index (TI) = 11.2 | [2] |

|    |                         |                                                   |                                                                                      |                                                                               |         |
|----|-------------------------|---------------------------------------------------|--------------------------------------------------------------------------------------|-------------------------------------------------------------------------------|---------|
| 37 | Toddacoumanone          | <i>Toddalia asiatica</i><br>F. Rutaceae           | 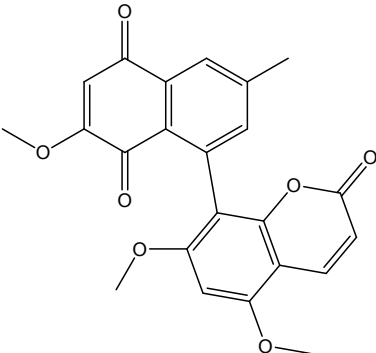   | Activity against <i>Herpes simplex</i> virus<br>ED <sub>50</sub> = 10 µg/mL   | [2]     |
| 38 | Suksdorfin (Saxdorphin) | <i>Lomatium suksdorfii</i><br>F. Apiaceae         |   | Activity against HIV<br>EC <sub>50</sub> = 2.6 µM                             | [2,4]   |
| 39 | (+)-Calanolide A        | <i>Calophyllum lanigerum</i><br>F. Calophyllaceae |  | Activity against HIV<br>EC <sub>50</sub> = 0.1 µM<br>IC <sub>50</sub> = 20 µM | [2,4,7] |

|    |                         |                                                   |                                                                                                                                                                                                                                                                                                                                                                                                                           |                                                                               |       |
|----|-------------------------|---------------------------------------------------|---------------------------------------------------------------------------------------------------------------------------------------------------------------------------------------------------------------------------------------------------------------------------------------------------------------------------------------------------------------------------------------------------------------------------|-------------------------------------------------------------------------------|-------|
| 40 | (+)-12-Oxocalanolide A  | <i>Calophyllum lanigerum</i><br>F. Calophyllaceae | 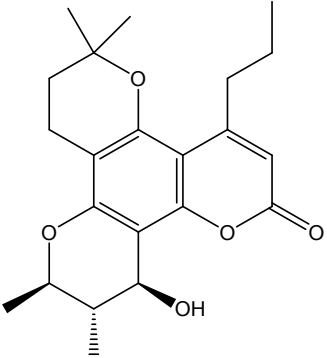 <p>The structure shows a complex polycyclic molecule with a central benzene ring fused to a six-membered ring containing an oxygen atom. A side chain with a methyl group and a hydroxyl group is attached to the six-membered ring. Another side chain with a propyl group and a carbonyl group is attached to the benzene ring.</p> | Activity against HIV                                                          | [7]   |
| 41 | 12-O-Acetylcalanolide A | <i>Calophyllum lanigerum</i><br>F. Calophyllaceae |  <p>The structure is similar to (+)-12-Oxocalanolide A, but the hydroxyl group at the 12-position is replaced by an acetyl group (-COCH<sub>3</sub>).</p>                                                                                                                                                                              | Activity against HIV                                                          | [10]  |
| 42 | (+)-Calanolide B        | <i>Calophyllum lanigerum</i><br>F. Calophyllaceae |  <p>The structure is similar to (+)-12-Oxocalanolide A, but the hydroxyl group at the 12-position is shown with a dashed bond, indicating it is on the opposite side of the ring.</p>                                                                                                                                                 | Activity against HIV<br>EC <sub>50</sub> = 0.4 μM<br>IC <sub>50</sub> = 15 μM | [2,4] |

|    |                                          |                                                   |                                                                                                                                                                                                                                                                                                                                                                                                                                                                                                                     |                                                   |        |
|----|------------------------------------------|---------------------------------------------------|---------------------------------------------------------------------------------------------------------------------------------------------------------------------------------------------------------------------------------------------------------------------------------------------------------------------------------------------------------------------------------------------------------------------------------------------------------------------------------------------------------------------|---------------------------------------------------|--------|
| 43 | (-)-<br>Dihydrocalanoli<br>de B          | <i>Calophyllum lanigerum</i><br>F. Calophyllaceae | 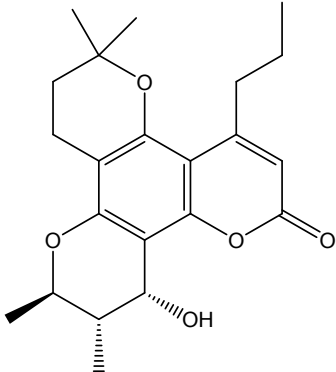 <p>The structure shows a central benzene ring with two furan rings fused at the 1 and 4 positions. A propyl group is attached to the 2-position of the furan ring at the 6-position of the benzene ring. A 2,2-dimethyl-1,3-dioxane ring is fused to the benzene ring at the 3 and 5 positions. The dioxane ring has a methyl group at the 2-position and a hydroxyl group at the 4-position, both shown with dashed bonds.</p> | Activity against HIV<br>EC <sub>50</sub> = 0.1 μM | [7,11] |
| 44 | Calanolide C                             | <i>Calophyllum lanigerum</i><br>F. Calophyllaceae |  <p>The structure is similar to (-)-Dihydrocalanolid B, but the dioxane ring is fused to the benzene ring at the 2 and 5 positions. The dioxane ring has a methyl group at the 2-position and a hydroxyl group at the 4-position, both shown with solid wedges.</p>                                                                                                                                                              | Activity against HIV<br>IC <sub>50</sub> = 30 μM  | [2]    |
| 45 | 12- <i>O</i> -<br>Methylcalanolid<br>e B | <i>Calophyllum lanigerum</i><br>F. Calophyllaceae |  <p>The structure features a central benzene ring with two furan rings fused at the 1 and 4 positions. A propyl group is attached to the 2-position of the furan ring at the 6-position of the benzene ring. A 2,2-dimethyl-1,3-dioxane ring is fused to the benzene ring at the 3 and 5 positions. The dioxane ring has a methyl group at the 2-position and a methoxy group at the 4-position.</p>                           | Activity against HIV                              | [10]   |

|    |              |                                                                             |                                                                                      |                                                  |        |
|----|--------------|-----------------------------------------------------------------------------|--------------------------------------------------------------------------------------|--------------------------------------------------|--------|
| 46 | Calanolide F | <i>Calophyllum lanigerum</i> ,<br><i>C. teysmannii</i><br>F. Calophyllaceae | 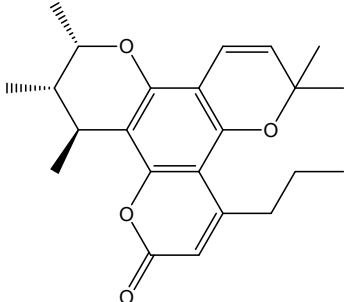  | Activity against HIV                             | [7]    |
| 47 | Inophyllum A | <i>Calophyllum inophyllum</i><br>F. Calophyllaceae                          |   | Activity against HIV<br>IC <sub>50</sub> = 30 μM | [7,12] |
| 48 | Inophyllum B | <i>Calophyllum inophyllum</i><br>F. Calophyllaceae                          |  | Activity against HIV<br>IC <sub>50</sub> = 38 μM | [4,12] |



|    |              |                                                    |                                                                                      |                      |        |
|----|--------------|----------------------------------------------------|--------------------------------------------------------------------------------------|----------------------|--------|
| 49 | Inophyllum C | <i>Calophyllum inophyllum</i><br>F. Calophyllaceae | 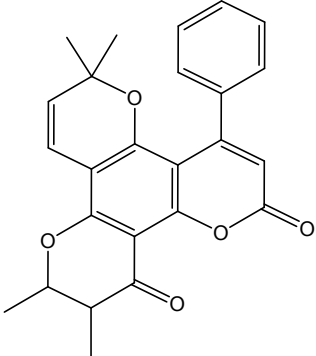  | Activity against HIV | [7]    |
| 50 | Inophyllum D | <i>Calophyllum inophyllum</i><br>F. Calophyllaceae |   | Activity against HIV | [7,12] |
| 51 | Inophyllum E | <i>Calophyllum inophyllum</i><br>F. Calophyllaceae |  | Activity against HIV | [7,12] |

|                  |                      |                                                            |                                                                                      |                                                           |               |
|------------------|----------------------|------------------------------------------------------------|--------------------------------------------------------------------------------------|-----------------------------------------------------------|---------------|
| <p><b>52</b></p> | <p>Inophyllum G1</p> | <p><i>Calophyllum inophyllum</i><br/>F. Calophyllaceae</p> | 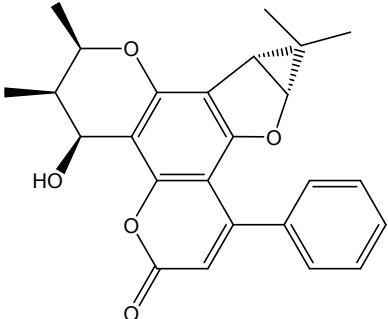   | <p>Activity against HIV</p>                               | <p>[7,12]</p> |
| <p><b>53</b></p> | <p>Inophyllum G2</p> | <p><i>Calophyllum inophyllum</i><br/>F. Calophyllaceae</p> |    | <p>Activity against HIV</p>                               | <p>[7,12]</p> |
| <p><b>54</b></p> | <p>Soulatrolide</p>  | <p><i>Calophyllum inophyllum</i><br/>F. Calophyllaceae</p> |  | <p>Activity against HIV<br/>IC<sub>50</sub> = 0.34 μM</p> | <p>[4,11]</p> |

|    |               |                                                          |                                                                                                                                                                                                                                                                                                                                                                                                                                                                        |                                                      |        |
|----|---------------|----------------------------------------------------------|------------------------------------------------------------------------------------------------------------------------------------------------------------------------------------------------------------------------------------------------------------------------------------------------------------------------------------------------------------------------------------------------------------------------------------------------------------------------|------------------------------------------------------|--------|
| 55 | Inophyllum P  | <i>Calophyllum inophyllum</i><br>F. Calophyllaceae       | 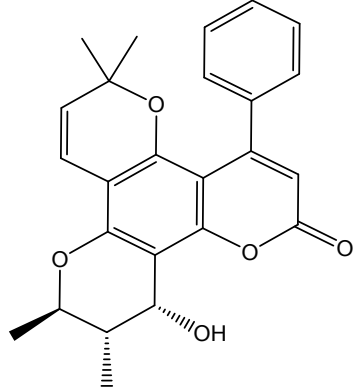 <p>The structure of Inophyllum P is a complex polycyclic molecule. It features a central benzene ring substituted with a piperidine ring (with a methyl group and a methylidene group), a coumarin ring (with a phenyl group and a carbonyl group), and a piperazine ring (with a methyl group and a methylidene group). A hydroxyl group is attached to the piperazine ring.</p>  | Activity against HIV<br>$IC_{50} = 130 \mu\text{M}$  | [4,12] |
| 56 | Cordatolide A | <i>Calophyllum cordato-oblongum</i><br>F. Calophyllaceae |  <p>The structure of Cordatolide A is a complex polycyclic molecule. It features a central benzene ring substituted with a piperidine ring (with a methyl group and a methylidene group), a coumarin ring (with a methyl group and a carbonyl group), and a piperazine ring (with a methyl group and a methylidene group). A hydroxyl group is attached to the piperazine ring.</p>  | Activity against HIV<br>$IC_{50} = 12.3 \mu\text{M}$ | [2]    |
| 57 | Cordatolide B | <i>Calophyllum cordato-oblongum</i><br>F. Calophyllaceae |  <p>The structure of Cordatolide B is a complex polycyclic molecule. It features a central benzene ring substituted with a piperidine ring (with a methyl group and a methylidene group), a coumarin ring (with a methyl group and a carbonyl group), and a piperazine ring (with a methyl group and a methylidene group). A hydroxyl group is attached to the piperazine ring.</p> | Activity against HIV<br>$IC_{50} = 19 \mu\text{M}$   | [2]    |

|    |                         |                                                                             |                                                                                       |                                                        |       |
|----|-------------------------|-----------------------------------------------------------------------------|---------------------------------------------------------------------------------------|--------------------------------------------------------|-------|
| 58 | Pseudocordatoli<br>de C | <i>Calophyllum lanigerum</i> ,<br><i>C. teysmannii</i><br>F. Calophyllaceae | 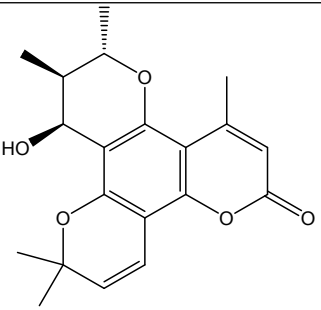   | Activity against HIV                                   | [7]   |
| 59 | Psoralen                | <i>Prangos tschimganica</i><br>F. Apiaceae                                  |    | Activity against HIV<br>EC <sub>50</sub> = 0.1 µg/mL   | [2,4] |
| 60 | Saxalin                 | <i>Prangos tschimganica</i><br>F. Apiaceae                                  |   | Activity against HIV                                   | [4]   |
| 61 | Bergapten               | <i>Prangos tschimganica</i><br>F. Apiaceae                                  |  | Activity against HIV<br>EC <sub>50</sub> = 0.354 µg/mL | [2,4] |

|    |               |                                         |                                                                                      |                                                    |     |
|----|---------------|-----------------------------------------|--------------------------------------------------------------------------------------|----------------------------------------------------|-----|
| 62 | Xanthotoxin   | <i>Ferula sumbul</i><br>F. Apiaceae     | 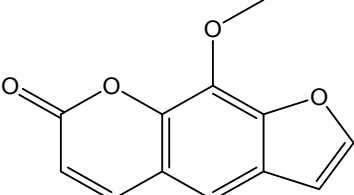   | Activity against HIV<br>therapeutic index (TI) > 5 | [4] |
| 63 | Byakangelicol | <i>Angelica apaensis</i><br>F. Apiaceae |   | Activity against HIV                               | [4] |
| 64 | Byakangelicin | <i>Angelica apaensis</i><br>F. Apiaceae |  | Activity against HIV                               | [4] |

|    |                                                       |                                                     |                                                                                                                            |                                                  |      |
|----|-------------------------------------------------------|-----------------------------------------------------|----------------------------------------------------------------------------------------------------------------------------|--------------------------------------------------|------|
| 65 | 7-(2',3'-Dihydroxy-3'-methylbutoxy)-6-methoxycoumarin | <i>Pterocaulon alopecuroides</i><br>F. Asteraceae   | 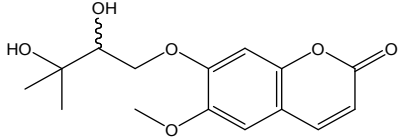                                         | Activity against <i>Herpes simplex</i> virus     | [13] |
| 66 | Isoschumanniphytine                                   | <i>Schumanniphyton magnificum</i><br>F. Rubiaceae   |                                         | Activity against <i>Herpes simplex</i> virus     | [14] |
| 67 | <i>N</i> -Methylisoschumanniphytine                   | <i>Schumanniphyton magnificum</i> F.<br>Rubiaceae   |  <p>Natural counteranion not known</p> | Activity against HIV                             | [14] |
| 68 | Lamellarin-alpha-20-sulfate                           | Marine invertebrates (mainly ascidians and sponges) |                                                                                                                            | Activity against HIV<br>IC <sub>50</sub> = 16 μM | [2]  |

|    |             |                                                                                                                  |                                                                                    |                      |      |
|----|-------------|------------------------------------------------------------------------------------------------------------------|------------------------------------------------------------------------------------|----------------------|------|
|    |             |                                                                                                                  | 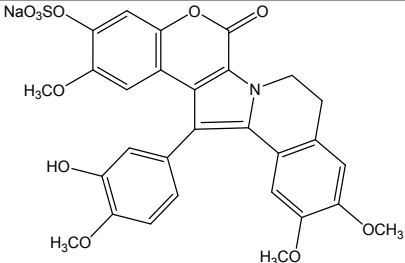 |                      |      |
| 69 | Punicalagin | <i>Terminalia</i> spp.,<br><i>Combretum molle</i><br>F. Combretaceae,<br><i>Punica granatum</i><br>F. Punicaceae |  | Activity against HIV | [15] |

|    |           |                                         |                                                                                                                                                                                                                                                                                                                                                                                                                                                                                                                                                                                  |                      |      |
|----|-----------|-----------------------------------------|----------------------------------------------------------------------------------------------------------------------------------------------------------------------------------------------------------------------------------------------------------------------------------------------------------------------------------------------------------------------------------------------------------------------------------------------------------------------------------------------------------------------------------------------------------------------------------|----------------------|------|
| 70 | Punicalin | <i>Punica granatum</i><br>F. Punicaceae | 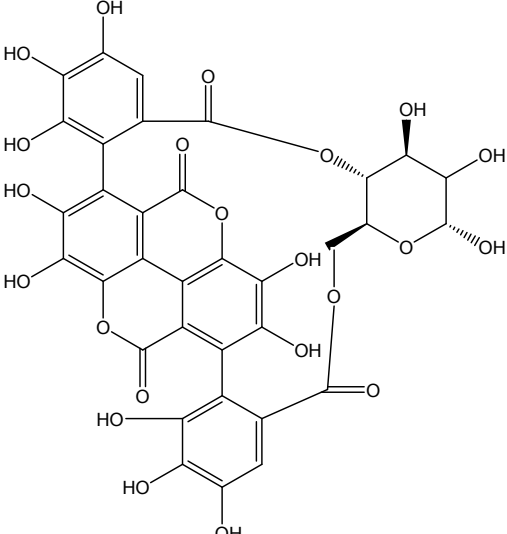 <p>The image shows the chemical structure of Punicalin, a polyphenolic compound. It consists of a central gallic acid unit (3,4,5-trihydroxybenzoic acid) that is esterified to three other gallic acid units. One of these units is further esterified to a glucose molecule. The glucose is in its cyclic pyranose form, with hydroxyl groups at the 2, 3, and 6 positions. The gallic acid units are linked via ester bonds, and the overall structure is highly branched and complex.</p> | Activity against HIV | [15] |
|----|-----------|-----------------------------------------|----------------------------------------------------------------------------------------------------------------------------------------------------------------------------------------------------------------------------------------------------------------------------------------------------------------------------------------------------------------------------------------------------------------------------------------------------------------------------------------------------------------------------------------------------------------------------------|----------------------|------|



|    |                 |                                                                                                         |                                                                                                                                                                                                                                                                                                                                                                                                                                                                                                                                                                                                                                                |                      |      |
|----|-----------------|---------------------------------------------------------------------------------------------------------|------------------------------------------------------------------------------------------------------------------------------------------------------------------------------------------------------------------------------------------------------------------------------------------------------------------------------------------------------------------------------------------------------------------------------------------------------------------------------------------------------------------------------------------------------------------------------------------------------------------------------------------------|----------------------|------|
| 71 | Rubradirin      | <p><i>Streptomyces achromogenes</i>,<br/> <i>Micromonospora saitamica</i><br/> F. Streptomycetaceae</p> | 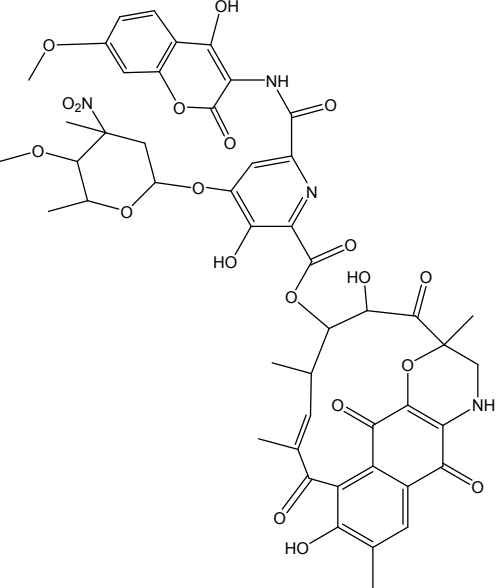 <p>The chemical structure of Rubradirin is a complex polyketide. It features a central naphthalene ring system with multiple hydroxyl groups and a methyl group. Attached to this core is a long, branched side chain containing a decalin-like bicyclic system, a lactone ring, and a nitrogen-containing ring. The side chain is further substituted with a 2-hydroxy-5-methoxyphenyl group, a 2-nitro-5-methoxyphenyl group, and a 2-hydroxy-5-methoxyphenyl group.</p>                                                                                  | Activity against HIV | [16] |
| 72 | Protorubradirin | <p><i>Streptomyces achromogenes</i><br/> F. Streptomycetaceae</p>                                       |  <p>The chemical structure of Protorubradirin is very similar to Rubradirin, but it lacks the nitro group on the phenyl ring of the side chain. It features a central naphthalene ring system with multiple hydroxyl groups and a methyl group. Attached to this core is a long, branched side chain containing a decalin-like bicyclic system, a lactone ring, and a nitrogen-containing ring. The side chain is further substituted with a 2-hydroxy-5-methoxyphenyl group, a 2-hydroxy-5-methoxyphenyl group, and a 2-hydroxy-5-methoxyphenyl group.</p> | Activity against HIV | [16] |

|    |               |                                                                          |                                                                                      |                                                                            |      |
|----|---------------|--------------------------------------------------------------------------|--------------------------------------------------------------------------------------|----------------------------------------------------------------------------|------|
| 73 | Coriandrin    | <i>Coriandrum sativum</i><br>F. Apiaceae                                 | 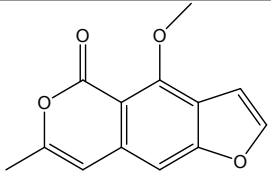  | Activity against HIV                                                       | [17] |
| 74 | (+)-Rutamarin | <i>Ruta graveolens</i><br>F. Apiaceae                                    |    | Activity against <i>Herpes simplex</i> virus<br>EC <sub>50</sub> = 1.62 μM | [2]  |
| 75 | Phellopterin  | <i>Angelica archangelica</i><br>F. Apiaceae                              |    | Activity against <i>Herpes simplex</i> virus                               | [18] |
| 76 | Angelicin     | <i>Angelica archangelica</i> ,<br><i>Apium graveolens</i><br>F. Apiaceae |  | Anti-influenza virus activity                                              | [2]  |

|    |                           |                                                                       |                                                                                      |                                                       |      |
|----|---------------------------|-----------------------------------------------------------------------|--------------------------------------------------------------------------------------|-------------------------------------------------------|------|
| 77 | Seselin                   | <i>Apium graveolens</i> ,<br><i>Foeniculum vulgare</i><br>F. Apiaceae | 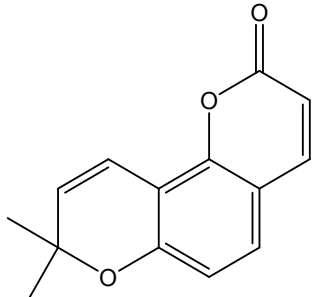  | Activity against HIV<br>EC <sub>50</sub> = 3.5 μM     | [11] |
| 78 | Oxypeucedanin methanolate | <i>Ferula sumbul</i> , <i>Angelica apaensis</i><br>F. Apiaceae        |    | Activity against HIV<br>EC <sub>50</sub> = 33 μg/mL   | [2]  |
| 79 | Heraclenin                | <i>Ferula sumbul</i> , <i>Prangos tschimganica</i><br>F. Apiaceae     |  | Activity against HIV<br>EC <sub>50</sub> = 2.37 μg/mL | [2]  |

|    |               |                                                                                                                                                                                                                                                                                                         |                                                                                     |                      |      |
|----|---------------|---------------------------------------------------------------------------------------------------------------------------------------------------------------------------------------------------------------------------------------------------------------------------------------------------------|-------------------------------------------------------------------------------------|----------------------|------|
| 80 | Umbelliferone | <i>Lantana camara</i><br>F. Verbenaceae;<br><i>Ficus nervosa</i><br>F. Moraceae;<br><i>Cyperus incompletus</i><br>F. Cyperaceae<br><i>Angelica archangelica</i> ,<br><i>Coriandrum sativum</i> ,<br><i>Apium graveolens</i> ,<br><i>Foeniculum vulgare</i> ,<br><i>Pimpinella anisum</i><br>F. Apiaceae | 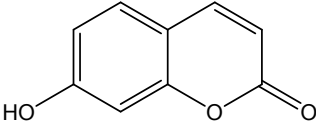 | Activity against HIV | [11] |
|----|---------------|---------------------------------------------------------------------------------------------------------------------------------------------------------------------------------------------------------------------------------------------------------------------------------------------------------|-------------------------------------------------------------------------------------|----------------------|------|

**Table S2.** A list of natural C-coumarins (**C-1** - **C-138**) isolated from different medicinal plants. The Table presents structures as shown in the primary literature, even if they may have been published without stereochemical details (like, e.g., for compounds **C-66** - **69** and others).

| No. | Compound Name    | Plant Source                            | Structure                                                                             | Ref. |
|-----|------------------|-----------------------------------------|---------------------------------------------------------------------------------------|------|
| 1   | Coumarin         | <i>Lantana camara</i><br>F. Verbenaceae | 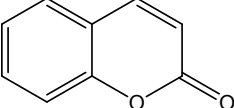  | [19] |
| 2   | 6-Methylcoumarin | <i>Lantana camara</i><br>F. Verbenaceae |  | [19] |
| 3   | Herniarin        | <i>Ficus platyphylla</i><br>F. Moraceae |  | [20] |

|   |                |                                                                                   |                                                                                       |         |
|---|----------------|-----------------------------------------------------------------------------------|---------------------------------------------------------------------------------------|---------|
| 4 | Isoscopoletin  | <i>Cyperus alopecuroides</i><br>F. Cyperaceae                                     | 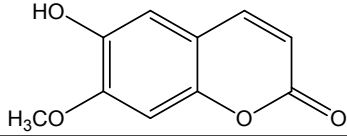   | [21]    |
| 5 | Scopoletin     | <i>Cyperus incompletus</i><br>F. Cyperaceae                                       |    | [21]    |
|   |                | <i>Ficus nervosa</i><br>F. Moraceae                                               |                                                                                       | [22]    |
|   |                | <i>Anethum graveolens, Pimpinella anisum</i><br>F. Apiaceae                       |                                                                                       | [23]    |
| 6 | Umbelliprenine | <i>Pimpinella anisum</i><br>Gum resin of <i>Ferula assafoetida</i><br>F. Apiaceae |    | [23,24] |
| 7 | Daphnin        | <i>Daphne giraldii</i><br>F. Thymelaeaceae                                        |   | [25]    |
| 8 | Daphnetin      | <i>Daphne giraldii</i><br>F. Thymelaeaceae                                        |  | [25]    |

|    |                                                                                                 |                                            |                                                                                       |      |
|----|-------------------------------------------------------------------------------------------------|--------------------------------------------|---------------------------------------------------------------------------------------|------|
| 9  | Daphnetin-8- <i>O</i> - $\beta$ -D-glucoside                                                    | <i>Daphne giraldii</i><br>F. Thymelaeaceae | 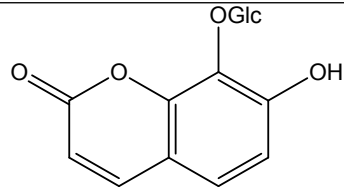   | [25] |
| 10 | Daphnetin-8- <i>O</i> - $\beta$ -D-glucopyranosyl(1 $\rightarrow$ 6) $\beta$ -D-glucopyranoside | <i>Daphne giraldii</i><br>F. Thymelaeaceae |    | [25] |
| 11 | Daphneside                                                                                      | <i>Daphne giraldii</i><br>F. Thymelaeaceae |    | [25] |
| 12 | 3-Chloro-7-methoxy-4-methylchromen-2-one                                                        | <i>Ficus krishnae</i><br>F. Moraceae       |    | [26] |
| 13 | 7-Hydroxy-8-methoxycoumarin                                                                     | <i>Daphne giraldii</i><br>F. Thymelaeaceae |   | [25] |
| 14 | 8-Hydroxy-7-methoxycoumarin                                                                     | <i>Daphne giraldii</i><br>F. Thymelaeaceae |  | [25] |

|    |                       |                                             |                                                                                      |      |
|----|-----------------------|---------------------------------------------|--------------------------------------------------------------------------------------|------|
| 15 | 5,7-Dimethoxycoumarin | <i>Cyperus incompletus</i><br>F. Cyperaceae | 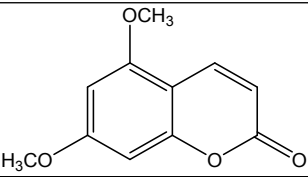  | [21] |
| 16 | 7,8-Dimethoxycoumarin | <i>Cyperus incompletus</i><br>F. Cyperaceae |   | [21] |
|    |                       | <i>Daphne giraldii</i><br>F. Thymelaeceae   |                                                                                      | [25] |
| 17 | Osthol                | <i>Angelica archangelica</i><br>F. Apiaceae |   | [23] |
| 18 | Osthenol              | <i>Apium graveolens</i><br>F. Apiaceae      |  | [23] |

|    |                                               |                                             |                                                                                      |      |
|----|-----------------------------------------------|---------------------------------------------|--------------------------------------------------------------------------------------|------|
| 19 | Apigravin                                     | <i>Apium graveolens</i><br>F. Apiaceae      | 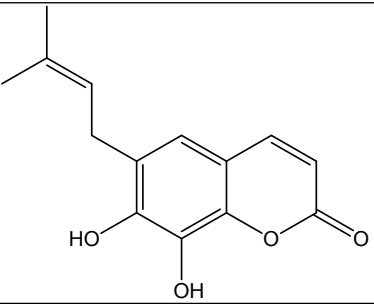  | [23] |
| 20 | 4-Methyl-7-hydroxycoumarin                    | <i>Daphne giraldii</i><br>F. Thymelaeaceae  |   | [25] |
| 21 | 5-Hydroxy-7-methoxycoumarin-8-O-β-D-glucoside | <i>Daphne giraldii</i><br>F. Thymelaeaceae  |   | [25] |
| 22 | 5,7,8-Trimethoxycoumarin                      | <i>Cyperus incompletus</i><br>F. Cyperaceae |  | [21] |



|    |                                                               |                                             |                                                                                       |      |
|----|---------------------------------------------------------------|---------------------------------------------|---------------------------------------------------------------------------------------|------|
| 23 | Leptodactylone                                                | <i>Cyperus incompletus</i><br>F. Cyperaceae | 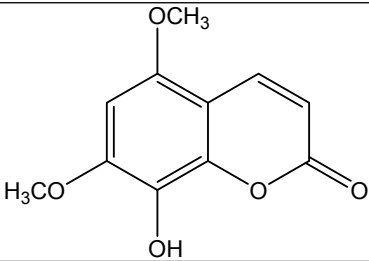   | [21] |
| 24 | Prenyletin                                                    | <i>Cyperus incompletus</i><br>F. Cyperaceae |    | [21] |
| 25 | 6-(2-Methoxyvinyl)-7-methyl-2H-1-benzopyran-2-one             | <i>Ficus carica</i><br>F. Moraceae          |   | [27] |
| 26 | 5,7-Dimethoxy-8-( $\gamma,\gamma$ -dimethylallyloxy) coumarin | <i>Cyperus incompletus</i><br>F. Cyperaceae |  | [21] |

|    |                                                          |                                             |                                                                                      |      |
|----|----------------------------------------------------------|---------------------------------------------|--------------------------------------------------------------------------------------|------|
| 27 | 7-Methoxy-8-( $\gamma,\gamma$ -dimethylallyloxy)coumarin | <i>Cyperus incompletus</i><br>F. Cyperaceae | 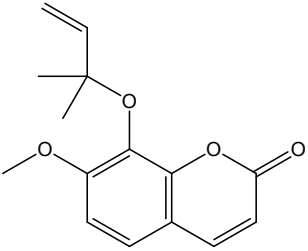  | [21] |
| 28 | 7-( $\gamma,\gamma$ -Dimethylallyloxy)-8-methoxycoumarin | <i>Cyperus incompletus</i><br>F. Cyperaceae |   | [21] |
| 29 | Celerin                                                  | <i>Apium graveolens</i><br>F. Apiaceae      |  | [23] |

|    |                |                                                       |                                                                                      |      |
|----|----------------|-------------------------------------------------------|--------------------------------------------------------------------------------------|------|
| 30 | Farnesiferol A | Gum resin of <i>Ferula assafoetida</i><br>F. Apiaceae | 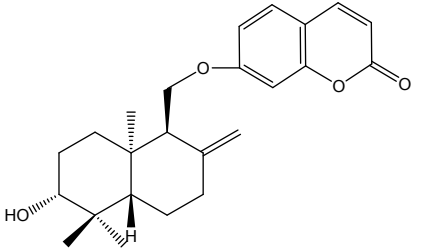  | [24] |
| 31 | Gummosin       | Gum resin of <i>Ferula assafoetida</i><br>F. Apiaceae |   | [24] |
| 32 | Gumoside B     | <i>Ferula gummosa</i> F.<br>Apiaceae                  |  | [28] |

|    |                  |                                                            |                                                                                      |      |
|----|------------------|------------------------------------------------------------|--------------------------------------------------------------------------------------|------|
| 33 | Ferukrinone      | Gum resin of <i>Ferula assafoetida</i><br>F. Apiaceae      | 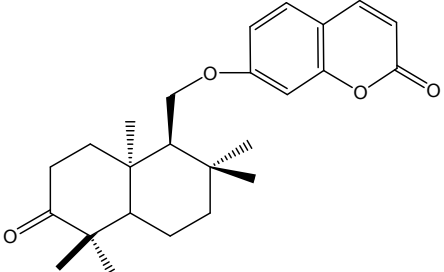  | [24] |
| 34 | Deacetylkellerin | Gum resin of <i>Ferula assafoetida</i><br>F. Apiaceae      |   | [24] |
| 35 | Badrakemin       | Oleo-gum resin of <i>Ferula assafoetida</i><br>F. Apiaceae |  | [29] |

|    |                    |                                                       |                                                                                      |      |
|----|--------------------|-------------------------------------------------------|--------------------------------------------------------------------------------------|------|
| 36 | Badrakemin acetate | Gum resin of <i>Ferula assafoetida</i><br>F. Apiaceae | 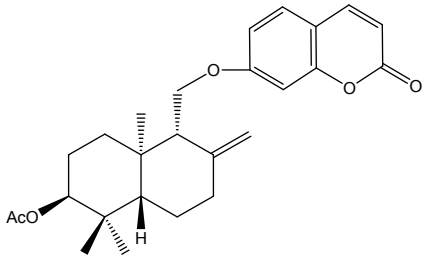  | [30] |
| 37 | Asimafoetidnol     | Gum resin of <i>Ferula assafoetida</i><br>F. Apiaceae |   | [31] |
| 38 | Mogoltadone        | <i>Ferula flabelliloba</i><br>F. Apiaceae             |  | [28] |

|    |              |                                                            |                                                                                      |      |
|----|--------------|------------------------------------------------------------|--------------------------------------------------------------------------------------|------|
| 39 | Mogoltacin   | <i>Ferula flabelliloba</i><br>F. Apiaceae                  | 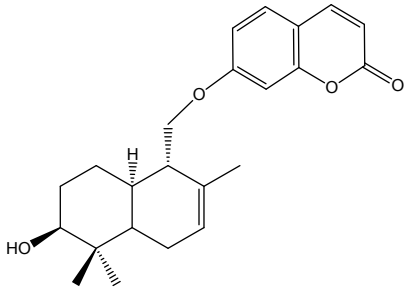  | [28] |
| 40 | Mogoltavidin | <i>Ferula galbaniflua</i><br>F. Apiaceae                   |   | [29] |
| 41 | Conferone    | Oleo-gum resin of <i>Ferula assafoetida</i><br>F. Apiaceae |  | [29] |

|    |               |                                                            |                                                                                      |      |
|----|---------------|------------------------------------------------------------|--------------------------------------------------------------------------------------|------|
| 42 | Conferdione   | <i>Ferula gummosa</i><br>F. Apiaceae                       | 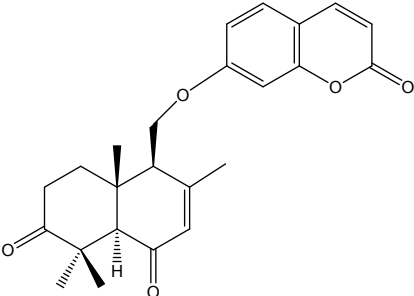  | [28] |
| 43 | Feslol        | Oleo-gum resin of <i>Ferula assafoetida</i><br>F. Apiaceae |   | [29] |
| 44 | Isosamarandin | Oleo-gum resin of <i>Ferula assafoetida</i><br>F. Apiaceae |  | [29] |

|    |             |                                                            |                                                                                       |         |
|----|-------------|------------------------------------------------------------|---------------------------------------------------------------------------------------|---------|
| 45 | Samarcandin | Oleo-gum resin of <i>Ferula assafoetida</i><br>F. Apiaceae | 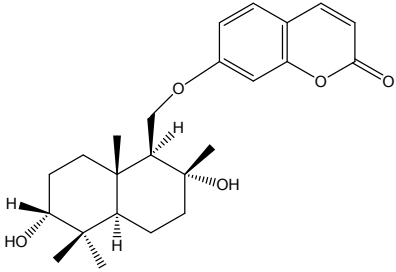   | [24,29] |
| 46 | Lehmferin   | <i>Ferula szowitsiana</i><br>F. Apiaceae                   |    | [28]    |
| 47 | Daphnogitin | <i>Daphne giraldii</i><br>F. Thymelaeaceae                 |    | [25]    |
| 48 | Daphnoretin | <i>Daphne giraldii</i><br>F. Thymelaeaceae                 |  | [25]    |
| 49 | Daphnorin   | <i>Daphne giraldii</i><br>F. Thymelaeaceae                 |  | [25]    |



|    |             |                                             |                                                                                      |      |
|----|-------------|---------------------------------------------|--------------------------------------------------------------------------------------|------|
| 50 | Dicoumarol  | <i>Melilotus officinalis</i><br>F. Fabaceae | 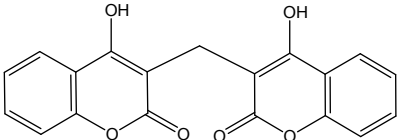  | [23] |
| 51 | Daphnolin   | <i>Daphne giraldii</i><br>F. Thymelaeaceae  |   | [25] |
| 52 | Daphgilin   | <i>Daphne giraldii</i><br>F. Thymelaeaceae  |   | [25] |
| 53 | Daphnogirin | <i>Daphne giraldii</i><br>F. Thymelaeaceae  |  | [25] |

|    |                                                       |                                            |                                                                                      |      |
|----|-------------------------------------------------------|--------------------------------------------|--------------------------------------------------------------------------------------|------|
| 54 | 6- <i>O</i> - $\alpha$ -L-Rhamnopyranosyl daphnogirin | <i>Daphne giraldii</i><br>F. Thymelaeaceae | 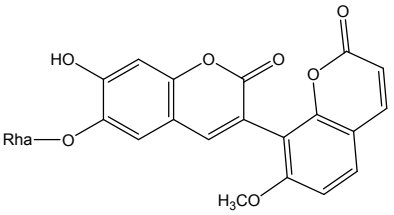  | [25] |
| 55 | 6- <i>O</i> - $\beta$ -D-Apiofuranosyl daphnogirin    | <i>Daphne giraldii</i><br>F. Thymelaeaceae |   | [25] |
| 56 | Giraldoid A                                           | <i>Daphne giraldii</i><br>F. Thymelaeaceae |   | [25] |
| 57 | Edgeworoside C                                        | <i>Daphne giraldii</i><br>F. Thymelaeaceae |  | [25] |

|    |                             |                                                                      |                                                                                                                                                                                                       |         |
|----|-----------------------------|----------------------------------------------------------------------|-------------------------------------------------------------------------------------------------------------------------------------------------------------------------------------------------------|---------|
| 58 | 8-Hydroxy-5-methoxypsoralen | <i>Daucus carota</i> subsp. <i>carota</i><br>F. Apiaceae             | 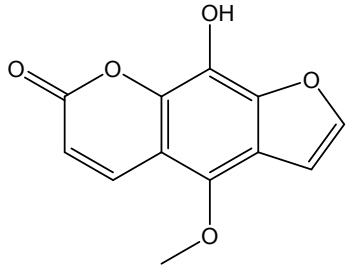 <p>The structure shows a psoralen core with a hydroxyl group at position 8 and a methoxy group at position 5.</p> | [23]    |
| 59 | 5,8-Dihydroxypsoralen       | <i>Apium graveolens</i><br>F. Apiaceae                               |  <p>The structure shows a psoralen core with hydroxyl groups at positions 5 and 8.</p>                             | [32]    |
| 60 | 8-Methoxypsoralen           | <i>Petroselinum crispum</i> , <i>Apium graveolens</i><br>F. Apiaceae |  <p>The structure shows a psoralen core with a methoxy group at position 8.</p>                                   | [23,32] |

|    |                     |                                        |                                                                                      |      |
|----|---------------------|----------------------------------------|--------------------------------------------------------------------------------------|------|
| 61 | 8-Hydroxybergapten  | <i>Apium graveolens</i><br>F. Apiaceae | 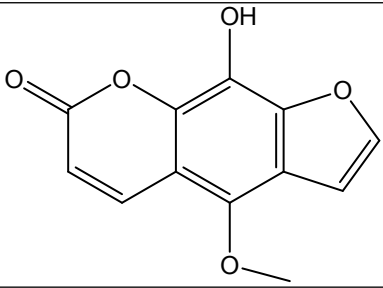  | [32] |
| 62 | 8-Geranoxy-psoralen | <i>Apium graveolens</i><br>F. Apiaceae |  | [32] |

|    |             |                                               |                                                                                       |      |
|----|-------------|-----------------------------------------------|---------------------------------------------------------------------------------------|------|
| 63 | Cnidilin    | <i>Apium graveolens</i><br>F. Apiaceae        | 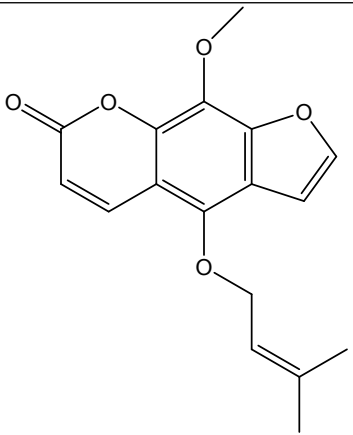   | [32] |
| 64 | Bergaptol   | <i>Apium graveolens</i><br>F. Apiaceae        |    | [32] |
| 65 | Xanthotoxol | <i>Cyperus alopecuroides</i><br>F. Cyperaceae |  | [21] |
|    |             | <i>Ficus carica</i><br>F. Moraceae            |                                                                                       | [33] |
|    |             | <i>Apium graveolens</i><br>F. Apiaceae        |                                                                                       | [32] |
|    |             | <i>Angelica archangelica</i><br>F. Apiaceae   |                                                                                       | [23] |

|    |            |                                             |                                                                                       |      |
|----|------------|---------------------------------------------|---------------------------------------------------------------------------------------|------|
| 66 | Oreoselone | <i>Angelica archangelica</i><br>F. Apiaceae | 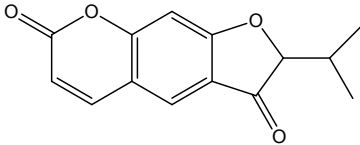   | [23] |
| 67 | Rutaretin  | <i>Apium graveolens</i><br>F. Apiaceae      |    | [23] |
| 68 | Apiumetin  | <i>Apium graveolens</i><br>F. Apiaceae      |    | [23] |
| 69 | Apiumoside | <i>Apium graveolens</i><br>F. Apiaceae      |    | [23] |
| 70 | Auraptene  | <i>Aegle marmelos</i><br>F. Rutaceae        |   | [23] |
| 71 | Marmesin   | <i>Ficus nervosa</i><br>F. Moraceae         |  | [22] |
|    |            | <i>Ammi majus</i><br>F. Apiaceae            |                                                                                       | [23] |

|    |                                                    |                                     |                                                                                                                                                                                                                                                                                                             |         |
|----|----------------------------------------------------|-------------------------------------|-------------------------------------------------------------------------------------------------------------------------------------------------------------------------------------------------------------------------------------------------------------------------------------------------------------|---------|
| 72 | 5-(1'',1''-Dimethylallyl)-8-methylpsoralen         | <i>Ficus carica</i><br>F. Moraceae  | 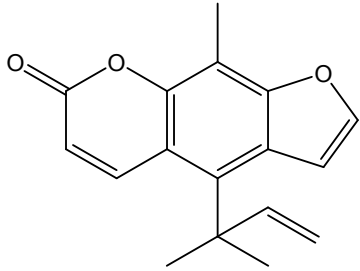 <p>The structure shows a psoralen core consisting of a coumarin ring fused to a furan ring. At the 5-position of the coumarin ring, there is a 1,1-dimethylallyl group. At the 8-position, there is a methyl group.</p> | [34]    |
| 73 | 2''-O-Acetyloxypeucedanin hydrate-3''-methyl ether | <i>Ficus carica</i><br>F. Moraceae  |  <p>The structure shows a psoralen core with a furan ring. At the 2'' position of the furan ring, there is an acetoxy group (AcO). At the 3'' position, there is a methyl ether group (OCH<sub>3</sub>).</p>             | [34]    |
| 74 | 5-O-β-D-Glucopyranosyl-8-hydroxypsoralen           | <i>Ficus species</i><br>F. Moraceae |  <p>The structure shows a psoralen core with a furan ring. At the 5-position of the coumarin ring, there is a hydroxyl group (OH). At the 8-position, there is a β-D-glucopyranosyl group (O-Glc).</p>                  | [35,36] |

|    |                                                           |                                                                                             |                                                                                       |         |
|----|-----------------------------------------------------------|---------------------------------------------------------------------------------------------|---------------------------------------------------------------------------------------|---------|
| 75 | 8- <i>O</i> - $\beta$ -D-Glucopyranosyl-5-hydroxypsoralen | <i>Ficus</i> species<br>F. Moraceae                                                         | 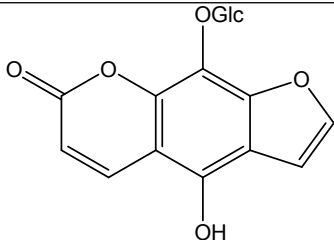   | [35,36] |
| 76 | Isopimpinellin                                            | <i>Ammi majus</i> , <i>Apium graveolens</i> ,<br><i>Petroselinum crispum</i><br>F. Apiaceae |    | [23]    |
| 77 | Pimpinellin                                               | <i>Cyperus papyrus</i><br>F. Moraceae                                                       |   | [21]    |
|    |                                                           | <i>Apium graveolens</i><br>F. Apiaceae                                                      |                                                                                       | [32]    |
| 78 | Sphondin                                                  | <i>Apium graveolens</i><br>F. Apiaceae                                                      |  | [32]    |



|    |                        |                                        |                                                                                       |      |
|----|------------------------|----------------------------------------|---------------------------------------------------------------------------------------|------|
| 79 | Isobergapten           | <i>Apium graveolens</i><br>F. Apiaceae | 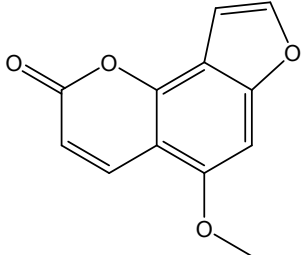   | [32] |
| 80 | Isobergaptol           | <i>Apium graveolens</i><br>F. Apiaceae |    | [32] |
| 81 | Sphondinol             | <i>Apium graveolens</i><br>F. Apiaceae |   | [32] |
| 82 | 5,6-Dihydroxyangelicin | <i>Apium graveolens</i><br>F. Apiaceae |  | [32] |

|    |                             |                                        |                                                                                      |      |
|----|-----------------------------|----------------------------------------|--------------------------------------------------------------------------------------|------|
| 83 | Lanatin                     | <i>Apium graveolens</i><br>F. Apiaceae | 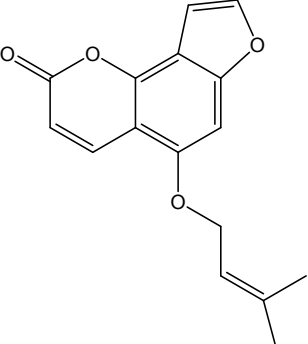  | [32] |
| 84 | Heratomin                   | <i>Apium graveolens</i><br>F. Apiaceae |   | [32] |
| 85 | 6-Isopentenylxyisobergapten | <i>Apium graveolens</i><br>F. Apiaceae |  | [32] |

|    |                                                    |                                        |                                                                                                                                                                                                                                                                                                                            |         |
|----|----------------------------------------------------|----------------------------------------|----------------------------------------------------------------------------------------------------------------------------------------------------------------------------------------------------------------------------------------------------------------------------------------------------------------------------|---------|
| 86 | 5-Isopentenylloxysphondin                          | <i>Apium graveolens</i><br>F. Apiaceae | 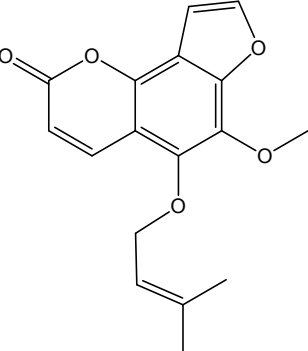 <p>The structure shows a central benzene ring substituted with a coumarin ring at the 2-position, a furfuryl ring at the 3-position, a methoxy group at the 4-position, and an isopentenyl ether chain at the 5-position.</p>          | [32]    |
| 87 | 5- <i>O</i> -β-D-Glucopyranosyl-6-hydroxyangelicin | <i>Ficus species</i><br>F. Moraceae    |  <p>The structure shows a central benzene ring substituted with a coumarin ring at the 2-position, a furfuryl ring at the 3-position, a hydroxyl group at the 4-position, and a β-D-glucopyranosyl group (OGlc) at the 5-position.</p>  | [35,36] |
| 88 | 6- <i>O</i> -β-D-Glucopyranosyl-5-hydroxyangelicin | <i>Ficus species</i><br>F. Moraceae    |  <p>The structure shows a central benzene ring substituted with a coumarin ring at the 2-position, a furfuryl ring at the 3-position, a hydroxyl group at the 5-position, and a β-D-glucopyranosyl group (OGlc) at the 6-position.</p> | [35,36] |

|    |                                                                      |                                     |                                                                                       |         |
|----|----------------------------------------------------------------------|-------------------------------------|---------------------------------------------------------------------------------------|---------|
| 89 | 5,6- <i>O</i> - $\beta$ -D-Diglucopyranosylangelicin                 | <i>Ficus</i> species<br>F. Moraceae | 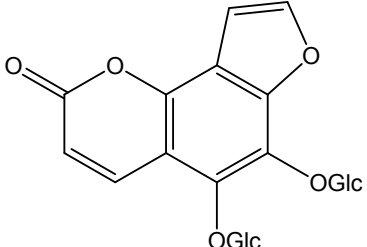   | [35,36] |
| 90 | 3-Hydroxyxanthyletin                                                 | <i>Ficus nervosa</i><br>F. Moraceae |    | [22]    |
| 91 | 3-Methoxyxanthyletin                                                 | <i>Ficus nervosa</i><br>F. Moraceae |    | [22]    |
| 92 | Xanthyletin                                                          | <i>Ficus nervosa</i><br>F. Moraceae |   | [22]    |
| 93 | 5-Methoxy-4,2'-epoxy-3-(4',5'-dihydroxyphenyl)-linear pyranocoumarin | <i>Ficus hirta</i><br>F. Moraceae   |  | [37]    |

|    |                 |                                           |                                                                                       |         |
|----|-----------------|-------------------------------------------|---------------------------------------------------------------------------------------|---------|
| 94 | Coumestrol      | <i>Punica granatum</i><br>F. Punicaceae   | 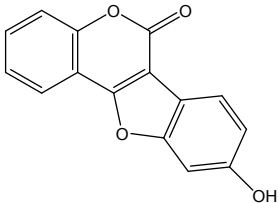   | [38]    |
| 95 | Isocoumarin     | <i>Ficus racemosa</i><br>F. Moraceae      |    | [39,40] |
| 96 | Baeckein A      | <i>Baeckea frutescens</i><br>F. Myrtaceae |   | [41]    |
| 97 | Bavacoumestan A | <i>Psoralea corylifoli</i><br>F. Fabaceae |  | [42]    |

|     |                 |                                              |                                                                                                                                                                                                                                                                                                                                                                                                                                                                                    |      |
|-----|-----------------|----------------------------------------------|------------------------------------------------------------------------------------------------------------------------------------------------------------------------------------------------------------------------------------------------------------------------------------------------------------------------------------------------------------------------------------------------------------------------------------------------------------------------------------|------|
| 98  | Bavacoumestan B | <i>Psoralea corylifoli</i><br>F. Fabaceae    | 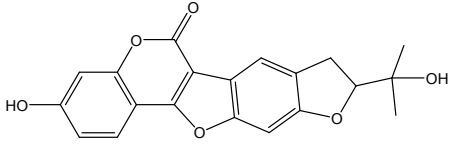 <p>The structure of Bavacoumestan B is a complex polycyclic molecule. It features a central benzene ring fused to a five-membered furan ring and a six-membered pyridone ring. A hydroxyl group (-OH) is attached to the benzene ring. The pyridone ring is further fused to another five-membered furan ring, which is substituted with a tert-butyl group and a hydroxyl group (-OH).</p>    | [42] |
| 99  | Beccamarin      | <i>Mesua beccariana</i><br>F. Calophyllaceae |  <p>The structure of Beccamarin is a complex polycyclic molecule. It features a central benzene ring fused to a five-membered furan ring and a six-membered pyridone ring. The pyridone ring is further fused to another five-membered furan ring, which is substituted with a methyl group and a hydroxyl group (-OH). A phenyl ring is attached to the central benzene ring.</p>              | [43] |
| 100 | Benahorin       | <i>Ruta pinnata</i><br>F. Rutaceae           |  <p>The structure of Benahorin is a complex polycyclic molecule. It features a central benzene ring fused to a five-membered furan ring and a six-membered pyridone ring. A methoxy group (-OCH<sub>3</sub>) is attached to the benzene ring. The pyridone ring is further fused to another five-membered furan ring, which is substituted with a methyl group and a hydroxyl group (-OH).</p> | [44] |

|     |                                                                                                                  |                                                    |                                                                                      |      |
|-----|------------------------------------------------------------------------------------------------------------------|----------------------------------------------------|--------------------------------------------------------------------------------------|------|
| 101 | 9-Benzoyl-2,3-dihydro-3-hydroxy-2-(1-hydroxy-1-methylethyl)-4-methoxy-5-phenyl-7H-furo[3,2-g]-1-benzopyran-7-one | <i>Calophyllum teysmannii</i><br>F. Calophyllaceae | 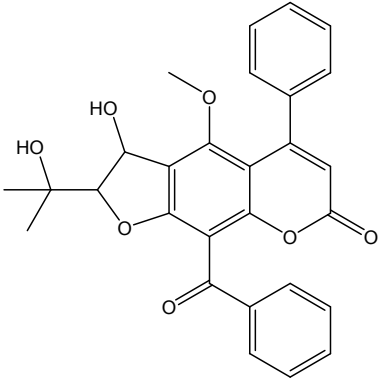  | [45] |
| 102 | 6-Benzoyl-8,9-dihydro-5-hydroxy-8-(1-hydroxy-1-methylethyl)-4-phenyl-2H-furo[2,3-h]-1-benzopyran-2-one           | <i>Calophyllum teysmannii</i><br>F. Calophyllaceae |  | [45] |

|     |                                                        |                                                    |                                                                                                                                                                                                                                                                                                                                                                                  |      |
|-----|--------------------------------------------------------|----------------------------------------------------|----------------------------------------------------------------------------------------------------------------------------------------------------------------------------------------------------------------------------------------------------------------------------------------------------------------------------------------------------------------------------------|------|
| 103 | 8-Benzoyl-5,7-dihydroxy-4-phenyl-2H-1-benzopyran-2-one | <i>Calophyllum teysmannii</i><br>F. Calophyllaceae | 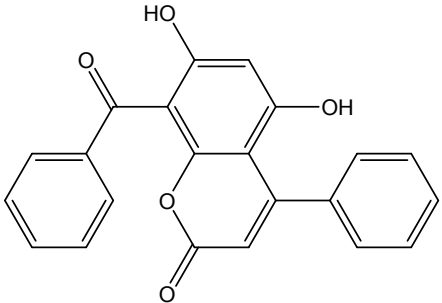 <p>The structure shows a central benzopyran ring system. The pyran ring has a carbonyl group at position 2 and a phenyl group at position 4. The benzene ring has hydroxyl groups at positions 5 and 7, and a benzoyl group at position 8.</p>                                               | [45] |
| 104 | Hydrohydroxyisocalanone                                | <i>Calophyllum teysmannii</i><br>F. Calophyllaceae |  <p>The structure is a complex polycyclic molecule. It features a central benzopyran core. Attached to this core are a benzoyl group, a hydroxyl group, and a side chain containing a five-membered furan ring and a quaternary carbon atom with two methyl groups and a hydroxyl group.</p> | [45] |



|     |                                                                                        |                                  |                                                                                      |      |
|-----|----------------------------------------------------------------------------------------|----------------------------------|--------------------------------------------------------------------------------------|------|
| 105 | 5-Isobutylcoumarin-6-C-glucoside                                                       | <i>Ammi majus</i><br>F. Apiaceae | 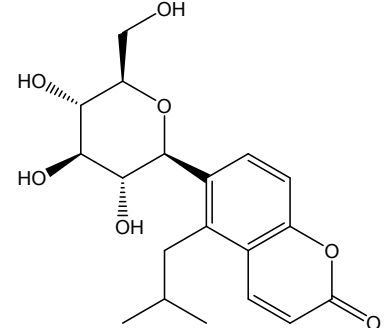  | [28] |
| 106 | 6,7,9-Trimethoxy-3-(8'-methoxy-2'-oxo-2H-chromen-3-yl)-2H-furo[3,2-g]chromen-2(3H)-one | <i>Ammi majus</i><br>F. Apiaceae |   | [46] |
| 107 | 6-Hydroxy-3-(2-hydroxypropyl)-7-methoxy-4 methylcoumarin                               | <i>Ammi majus</i><br>F. Apiaceae |  | [46] |

|     |                                  |                                  |                                                                                      |      |
|-----|----------------------------------|----------------------------------|--------------------------------------------------------------------------------------|------|
| 108 | Isoarnottinin                    | <i>Ammi majus</i><br>F. Apiaceae | 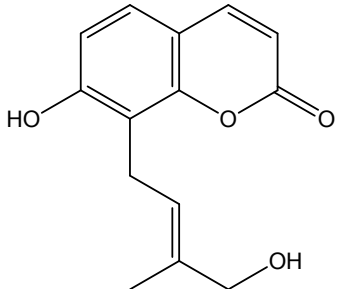  | [47] |
| 109 | Isoarnottinin-7-O-β-D-glucoside  | <i>Ammi majus</i><br>F. Apiaceae |   | [47] |
| 110 | Isoarnottinin-4'-O-β-D-glucoside | <i>Ammi majus</i><br>F. Apiaceae |  | [47] |

|     |                                                      |                                  |                                                                                                                                                                                                                                                                                                                                                                           |      |
|-----|------------------------------------------------------|----------------------------------|---------------------------------------------------------------------------------------------------------------------------------------------------------------------------------------------------------------------------------------------------------------------------------------------------------------------------------------------------------------------------|------|
| 111 | 8-(2''-Acetoxy-3''-hydroxy-3''-methylbutoxy)psoralen | <i>Ammi majus</i><br>F. Apiaceae | 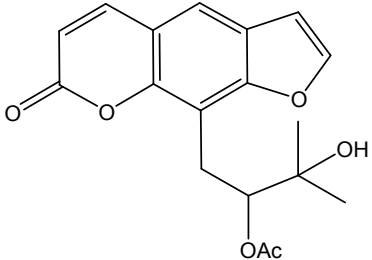 <p>The structure shows a psoralen core (a benzopyrone fused to a furan ring). At the 8-position of the benzopyrone ring, there is a butoxy chain. The 2-position of this butoxy chain has an acetoxy group (OAc) and the 3-position has a hydroxyl group (OH) and a methyl group.</p> | [47] |
| 112 | Dihydroxanthyletin                                   | <i>Ammi majus</i><br>F. Apiaceae |  <p>The structure shows a psoralen core. At the 8-position of the benzopyrone ring, there is a tetrahydrofuran ring. The 2-position of this tetrahydrofuran ring has a methyl group and a hydroxyl group (OH).</p>                                                                     | [47] |
| 113 | Lomatin                                              | <i>Ammi majus</i><br>F. Apiaceae |  <p>The structure shows a psoralen core. At the 8-position of the benzopyrone ring, there is a tetrahydrofuran ring. The 2-position of this tetrahydrofuran ring has a methyl group and a hydroxyl group (HO).</p>                                                                     | [47] |
| 114 | Ammirol                                              | <i>Ammi majus</i><br>F. Apiaceae |  <p>The structure shows a psoralen core. At the 8-position of the benzopyrone ring, there is a tetrahydrofuran ring. The 2-position of this tetrahydrofuran ring has a methyl group and a hydroxymethyl group (HO-CH<sub>2</sub>).</p>                                                | [47] |

|     |                                                                                               |                                            |                                                                                       |      |
|-----|-----------------------------------------------------------------------------------------------|--------------------------------------------|---------------------------------------------------------------------------------------|------|
| 115 | (-)- <i>cis</i> -Khellactone                                                                  | <i>Peucedanum japonicum</i><br>F. Apiaceae | 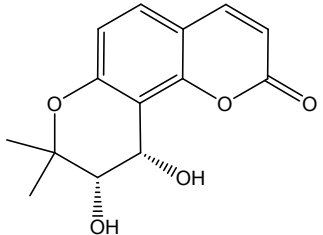   | [30] |
| 116 | (+) - <i>trans</i> -Khallactone                                                               | <i>Peucedanum japonicum</i><br>F. Apiaceae |    | [48] |
| 117 | 1'- <i>O</i> -β-D-Glucopyranosyl-3'-hydroxynodakenetin                                        | <i>Angelica dahurica</i><br>F. Apiaceae    |   | [49] |
| 118 | (3' <i>S</i> )-Hydroxynodakenetin-4'- <i>O</i> -β-D-apiofuranosyl-(1 → 6)-β-D-glucopyranoside | <i>Angelica dahurica</i><br>F. Apiaceae    |  | [49] |

|     |                                                                  |                                         |                                                                                                                                                                                                                                                                                                                                                                                                                                                                                     |      |
|-----|------------------------------------------------------------------|-----------------------------------------|-------------------------------------------------------------------------------------------------------------------------------------------------------------------------------------------------------------------------------------------------------------------------------------------------------------------------------------------------------------------------------------------------------------------------------------------------------------------------------------|------|
| 119 | Columbianetin 2'-O-β-D-glucopyranoside                           | <i>Angelica dahurica</i><br>F. Apiaceae | 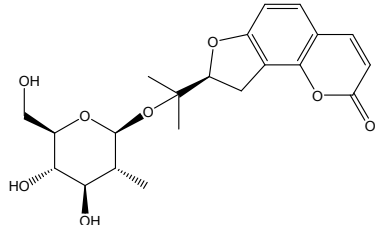 <p>The structure shows a glucose molecule in its pyranose form. At the 2' position, there is an ether linkage to a side chain. This side chain consists of a quaternary carbon atom bonded to a methyl group, a propyl group, and an oxygen atom. The oxygen atom is part of a five-membered furan ring, which is further substituted with a 6-methoxy-2-pyrone ring system.</p>                | [49] |
| 120 | Columbianetin 2'-O-β-D-apiofuranosyl-(1 → 6)-β-D-glucopyranoside | <i>Angelica dahurica</i><br>F. Apiaceae |  <p>This structure is similar to the previous one, but the glucose molecule is linked to an apiofuranose molecule at the 6' position. The apiofuranose is a five-membered furanose ring with a hydroxymethyl group at the 2' position and a hydroxyl group at the 3' position. It is connected to the glucose molecule via an oxygen atom at the 1' position.</p>                                | [49] |
| 121 | Byakangelicin 3''-O-β-D-glucopyranoside                          | <i>Angelica dahurica</i><br>F. Apiaceae |  <p>The structure shows a glucose molecule in its pyranose form. At the 3'' position, there is an ether linkage to a side chain. This side chain consists of a quaternary carbon atom bonded to a methyl group, a propyl group, and an oxygen atom. The oxygen atom is part of a side chain that includes a 6-methoxy-2-pyrone ring system, which is further substituted with a furan ring.</p> | [49] |

|     |                                                                                               |                                         |                                                                                     |      |
|-----|-----------------------------------------------------------------------------------------------|-----------------------------------------|-------------------------------------------------------------------------------------|------|
| 122 | Byakangelicin 3''-O- $\beta$ -D-apiofuranosyl-(1 $\rightarrow$ 6)- $\beta$ -D-glucopyranoside | <i>Angelica dahurica</i><br>F. Apiaceae | 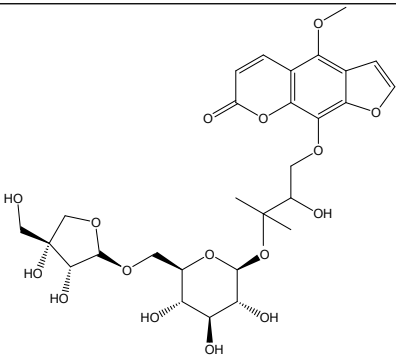 | [49] |
| 123 | 2''-Sulfo-( $\pm$ )-byakangelicin                                                             | <i>Angelica dahurica</i><br>F. Apiaceae |  | [49] |

|     |                                                                           |                                         |                                                                                      |      |
|-----|---------------------------------------------------------------------------|-----------------------------------------|--------------------------------------------------------------------------------------|------|
| 124 | 5,8-Bis-(2,3-dihydroxy-3-methylbutyloxy)-psoralen                         | <i>Angelica dahurica</i><br>F. Apiaceae | 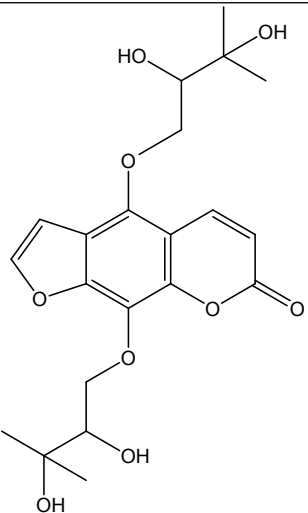  | [49] |
| 125 | 3''-O-β-D-Glucopyranosyl-5,8-bis(2,3-dihydroxy-3-methylbutyloxy)-psoralen | <i>Angelica dahurica</i><br>F. Apiaceae |  | [49] |

|     |                                                       |                                         |                                                                                      |      |
|-----|-------------------------------------------------------|-----------------------------------------|--------------------------------------------------------------------------------------|------|
| 126 | 2''-Sulfo-(±)-oxypeucedanin hydrate                   | <i>Angelica dahurica</i><br>F. Apiaceae | 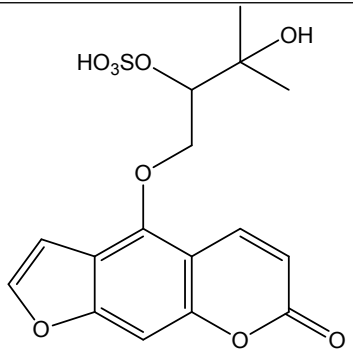  | [49] |
| 127 | 3''-Sulfo-(±)-oxypeucedanin hydrate                   | <i>Angelica dahurica</i><br>F. Apiaceae |   | [49] |
| 128 | <i>R</i> -(+)-Oxypeucedanin hydrate-3''-sucrose ether | <i>Angelica dahurica</i><br>F. Apiaceae |  | [49] |



|     |                |                                               |                                                                                      |      |
|-----|----------------|-----------------------------------------------|--------------------------------------------------------------------------------------|------|
| 129 | Hydroxylomatin | <i>Angelica purpuraeifolia</i><br>F. Apiaceae | 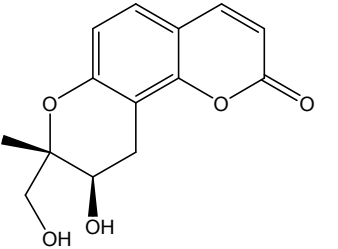  | [50] |
| 130 | Discophoridin  | <i>Angelica purpuraeifolia</i><br>F. Apiaceae |   | [50] |
| 131 | Angelinol      | <i>Angelica purpuraeifolia</i><br>F. Apiaceae |  | [50] |

|     |                          |                                            |                                                                                      |      |
|-----|--------------------------|--------------------------------------------|--------------------------------------------------------------------------------------|------|
| 132 | Isogospherol             | <i>Ducrosia anethifolia</i><br>F. Apiaceae | 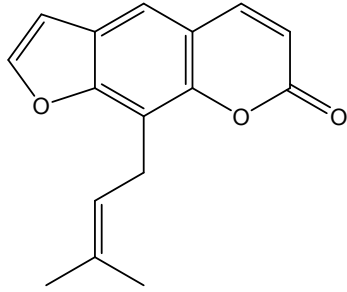  | [51] |
| 133 | 6,7-Dihydroxybergamottin | <i>Peucedanum luxurians</i><br>F. Apiaceae |   | [52] |
| 134 | Officinalin              | <i>Peucedanum luxurians</i><br>F. Apiaceae |  | [52] |

|     |                         |                                            |                                                                                       |      |
|-----|-------------------------|--------------------------------------------|---------------------------------------------------------------------------------------|------|
| 135 | Stenocarpin isobutyrate | <i>Peucedanum luxurians</i><br>F. Apiaceae | 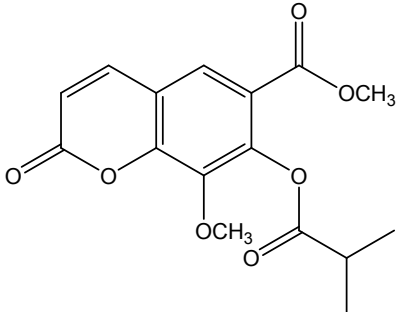   | [52] |
| 136 | Officinalin isobutyrate | <i>Peucedanum luxurians</i><br>F. Apiaceae |    | [52] |
| 137 | 8-Methoxypeucedanin     | <i>Peucedanum luxurians</i><br>F. Apiaceae |   | [52] |
| 138 | Peucedanin              | <i>Peucedanum luxurians</i><br>F. Apiaceae |  | [52] |

## References

1. Fortin, H.; Tomasi, S.; Jaccard, P.; Robin, V.; Boustie, J. A prenyloxycoumarin from *Psiadia dentate*. *Chem. Pharm. Bull.* **2001**, *49*, 619-621.
2. Hassan, M.Z.; Osman, H.; Ali, M.A.; Ahsan, M.J. Therapeutic potential of coumarins as antiviral agents. *Eur. J. Med. Chem.* **2016**, *123*, 236-255.
3. Huang, S.C.; Wu, P.L.; Wu, T.S. Two coumarins from the root bark of *Clausena excavata*. *Phytochemistry* **1997**, *44*, 179–181.
4. Chattopadhyay, S.K. Pharmacological potentiality of coumarins as anti-viral agent. *Int. J. Res. Anal. Rev.* **2018**, *5*, 281–291.
5. Mishra, S.; Pandey, A.; Manvat, S. Coumarin: An emerging antiviral agent. *Heliyon* **2020**, *6*, e03217.
6. Dissanayake, K.G.C.; Perera, W.P.R.T. Medicinal importance of *Ferula asafetida* oligogum resins against infective diseases. *J. Med. Plants Stud.* **2020**, *8*, 135-139.
7. Venugopala, K.N.; Rashmi, V.; Odhav, B. Review on natural coumarin lead compounds for their pharmacological activity. *Biomed. Res. Int.* **2013**, 963248.
8. Shokoohinia, Y.; Sajjadi, S.-E.; Gholamzadeh, S.; Fattahi, A.; Behbahani, M. Antiviral and cytotoxic evaluation of coumarins from *Prangos ferulacea*. *Pharm. Biol.* **2014**, *52*, 1543-1549.
9. Bedoya, L.M.; Beltran, M.; Sancho, R.; Olmedo, D.A.; Sanchez-Palomino, S.; Olmo, D.E.; Lopez-Perez, J.L.; Munoz, E.; San A.F.; Alcami J. 4-Phenylcoumarins as HIV transcription inhibitors. *Bioorg. Med. Chem. Lett.* **2005**, *15*, 4447-4450.
10. Nahar, L.; Talukdar, A. D.; Nath, D.; Nath, S.; Mehan, A.; Ismail, F.M.D.; Sarker, S.D. Naturally Occurring Calanolides: Occurrence, biosynthesis, and pharmacological properties including therapeutic potential. *Molecules* **2020**, *25*, 4983.
11. Kostova, I.; Mojzic, J. Biologically active coumarins as inhibitor of HIV-1. *Future HIV Therapy* **2007**, *1*, 315-329.

12. Patil, A.D.; Freyer, A.J.; Eggleston, D.S.; Haltiwanger, R.C.; Bean, M.F.; Taylor, P.B.; Caranfa, M.J.; Breen, A.L.; Bartus, H.R.; Johnson, R.K.; Hertzberg, R.P.; Westley, J.W. The inophyllums, novel inhibitors of HIV-1 reverse transcriptase isolated from the Malaysian tree, *Calophyllum inophyllum* Linn. *J. Med. Chem.* **1993**, *36*, 4131-4138.
13. Silveira, C.S.; Martins, F.O.; Romanos, M.T.V.; Costa, C.S.; Kaplan, M.A.C.; Menezes, F.S. In vitro cytotoxic, antioxidant and antiviral effects of *Pterocaulon alopecuroides* and *Bidens segetum* extracts. *Rev. Bras. Farmacogn.* **2009**, *19*, 343-348.
14. Houghton, P.J.; Woldemariam, T.Z.; Khan, A.I.; Burke, A.; Mahmood, N.A. Antiviral activity of natural and semi-synthetic chromone alkaloids. *Antivir. Res.* **1994**, *25*, 235-244.
15. Nonaka, G.; Nishioka, I.; Nishizawa, M.; Yamagishi, T.; Kashiwada, Y.; Dutschman, G.E.; Bodner, A.J.; Kilkuskie, R.E.; Cheng, Y.; Lee, K. Anti-AIDS agents, 2. Inhibitory effects of tannins on HIV reverse transcriptase and HIV replication in H9 lymphocyte cells. *J. Nat. Prod.* **1990**, *53*, 587-595.
16. WO1988008707A3.
17. Barkat, M.A.; Rizwanullah, M.; Naim J.; Pottoo, F.H.; Kumar, R. Phytoconstituents as potential anti-HIV agents: A systematic review. *Int. J. Biomed. Res.* **2014**, *5*, 299-313.
18. Rajtar, B.; Skalicka-Woźniak, K., Świątek, Ł., Stec, A.; Boguszevska, A.; Polz-Dacewicz, M. Antiviral effect of compounds derived from *Angelica archangelica* L. on *Herpes simplex virus-1* and *Coxsackievirus B3* infections. *Food Chem. Toxicol.* **2017**, *109*, 1026-1031.
19. Hussain, H.; Hussain, J.; Al-Harrasi, A.; Shinwari, Z.K. Chemistry of Some Species Genus *Lantana*. *Pak. J. Bot.* **2011**, *43*, 51-62.
20. El-Sayyad, S.M.; Sayed, H.M.; Mousa, S.M. Chemical constituents and preliminary anthelmintic activity of *Ficus platyphylla* (Del.). *Bull. Pharm. Sci. (Assiut Univ.)* **1986**, *8*, 164-177.

21. Mohamed, G.A.; Kamal, H.M.K.; Elhady, S.S.; Ibrahim, S.R.M.. A Review: Compounds isolated from *Cyperus* species (Part I): Phenolics and nitrogenous. *Int. J. Pharmacogn. Phytochem. Res.* **2015**, *7*, 51-67.
22. Chen, L.-W.; Cheng, M.-J.; Peng, C.-F.; Chen I.-S. Secondary metabolites and antimycobacterial activities from the roots of *Ficus nervosa*. *Chem. Biodivers.* **2010**, *7*, 1814-1821.
23. Matos, M.J.; Santana, L.; Uriarte, E.; Abreu, O.A.; Molina, E.; Yordi, E.G. Coumarins - an important class of phytochemicals. <http://dx.doi.org/10.5772/59982>, **2014**.
24. Iranshahi, M.; Farhadi, F.; Paknejad, B.; Zareian, P.; Iranshahi, M.; Karami, M.; Abtahi, S.R. Gummosin, a sesquiterpene coumarin from *Ferula assa-foetida* is preferentially cytotoxic to human breast and prostate cancer cell lines. *Avicenna J. Phytomed.* **2019**, *9*, 446-453.
25. Han, S.; Li, L.; Song, S. *Daphne giraldii* Nitsche (Thymelaeaceae): Phytochemistry, pharmacology and medicinal uses. *Phytochemistry* **2020**, *171*, 112231.
26. Parveen, M.; Ali, A.; Malla, A.M.; Silva, P.S.P.; Silva, M.R. A halogenated coumarin from *Ficus krishnae*. *Chem. Pap.* **2011**, *65*, 735-738.
27. Yin, W.; Chen, H.; Wang, T.; Cai, M. A new coumarin compound with anticancer activity. *Zhongcaoyao* **1997**, *28*, 3-4.
28. Kasaian, J.; Mosaffa, F.; Behravan, J.; Masullo, M.; Piacente, S; Iranshahi, M. Modulation of multidrug resistance protein 2 efflux in the cisplatin resistance human ovarian carcinoma cells A2780/RCIS by sesquiterpene coumarins. *Phytother. Res.* **2016**, *30*, 84-89.
29. Asghari, J.; Atabaki, V.; Baher, E.; Mazaheritehrani, M. Identification of sesquiterpene coumarins of oleo-gum resin of *Ferula assa-foetida* L. from the Yasuj region. *Nat. Prod. Res.* **2016**, *30*, 350-353.
30. A. Ghannadi, K. Fattahian, Y. Shokoohinia, M. Behbahani and A. Shahnoush, *Iran. J. Pharm. Res.* **2014**, *12*, 523-530.
31. Bandyopadhyay, D.; Banerjee, M.; Laskar, S.; Basaka, B. Asimafoetidnol: a new sesquiterpenoid coumarin from the gum resin of *Ferula assa-foetida*. *Nat. Prod. Commun.* **2011**, *6*, 209-212.

32. Salehi, B.; Venditti, A.; Frezza, C.; Yüce-tepe, A.; Altunta, Ü.; Uluata, S.; Butnariu, M.; Sarac, I.; Shaheen, S.; Petropoulos, S.A.; Matthews, K.R.; Kılıç, C.S.; Atanassova, M.; Adetunji, C.O.; Ademiluyi, A.O.; Özçelik, B.; Fokou P.V.T.; Martins, N.; Cho, W.C.; Sharifi-Rad, J. *Apium* Plants: beyond simple food and phytopharmacological applications. *Appl. Sci.* **2019**, *9*, 1-39.
33. Balas, R.K.; Agha, R. Isolation of a hypoglycemic principle from the bark of *Ficus glomerata* Roxb. *Chem. Pharm. Bull.* **1985**, *2*, 13-14.
34. Jain, R.; Jain, S.C.; Bhagchandania, T.; Yadava, N. New furanocoumarins and other chemical constituents from *Ficus carica* root heartwood. *Z. Naturforsch.* **2013a**, *68c*, 3-7.
35. Lansky, E.P.; Paavilainen, H.M.; Pawlus, A.D.; Newman, R.A. *Ficus* spp. (fig): Ethnobotany and potential as anticancer and anti-inflammatory agents *J. Ethnopharmacol.* **2008**, *119*, 195-213.
36. Chang M.-S., Yang Y.-C., Kuo Y.-C., Kuo Y.-H., Chang C., Chen C.-M., Lee T.-H. Furocoumarin glycosides from the leaves of *Ficus ruficaulis* Merr. var. *antaoensis*. *J. Nat. Prod.* **2005**, *68*, 11–13.
37. Ya, J.; Zhang, X.-Q.; Wang, Y.; Zhang, Q.-W.; Chen, J.-X.; Ye, W.-C. Two new phenolic compounds from the roots of *Ficus hirta*. *Nat. Prod. Res.* **2010**, *24*, 621-625.
38. Lansky, E. P.; Newman, R. A. *Punica granatum* (pomegranate) and its potential for prevention and treatment of inflammation and cancer. *J. Ethnopharmacol.* **2007**, *109*, 177–206.
39. Ahmed, F.; Urooj, A. Hepatoprotective effects of *Ficus racemosa* stem bark against carbon tetrachloride-induced hepatic damage in albino rats. *Pharm. Biol.* **2010**, *48*, 210-216.
40. Jain, R.; Rawat, S.; Jain, S.C. Phytochemicals and antioxidant evaluation of *Ficus racemosa* root bark. *J. Pharm. Res.* **2013b**, *6*, 615-619.
41. Jia, B.X.; Ren, F.X.; Jia, L.; Chen, X.Q.; Yang, J.; Wang, Q. Baecklein E, a new bioactive C-methylated biflavonoid from the roots of *Baeckea frutescens*. *Nat. Prod. Res.* **2013**, *27*, 2069-2075.

42. Gupta, S.; Jha, B.N.; Gupta, G.K.; Gupta, B.K.; Dhar, K.L. Coumestans from seeds of *Psoralea corylifolia*. *Phytochemistry* **1990**, *29*, 2371-2373.
43. Ee, G.C.L.; Teh, S.S.; Mah, S.H.; Rahmani, M.; Yap, Y.H.T.; Awang, K.A. Novel Cyclodione Coumarin from the Stem Bark of *Mesua beccariana*. *Molecules* **2011**, *16*, 7249–7255.
44. González, A.G.; Martínez, E.A.; Iniguez, M.A.M.; Luis, F.R. New sources of natural coumarins. Products of twigs of *Ruta pinnata* L. Fil, structure of benahorin. *Awl. Quim.* **1971**, *67*, 441.
45. Cao, S.G.; Wu, X.H.; Sim, K.Y.; Tan, B.H.K.; Vittal, J.J.; Pereira, J.T.; Goh, S.H. Minor coumarins from *Calophyllum teysmannii* var. *inophylloide* and synthesis of cytotoxic calanone derivatives. *Helv. Chim. Acta* **1998**, *81*, 1404–1416.
46. El-Sharkawy, E.; Selim, Y. Three new coumarin types from aerial parts of *Ammi majus* L. and their cytotoxic activity. *Z. Naturforsch C J. Biosci.* **2018**, *73*, 1-7.
47. Elgamal, M.H.A.; Shalaby, N.M.M.; Duddeck, H.; Hiegemann, M. Coumarins and coumarin glucosides from the fruits of *Ammi majus*. *Phytochemistry* **1993**, *34*, 819-823.
48. Duh, C.-Y.; Wang, S.-K.; Wu, Y.-C. Cytotoxic pyranocoumarins from roots of *Peucedanum japonicum*. *Phytochemistry* **1992**, *31*, 1829.
49. Matsuo Y., Yamaguchi E., Hakamata R., Ootomo K., Takatori K., Fukaya H., Mimaki Y. Benzofuran and coumarin derivatives from the root of *Angelica dahurica* and their PPAR- $\gamma$  ligand-binding activity. *Phytochemistry* **2020**, *173*, 112301.
50. Lee, H.-K.; Oh, S.-R.; Kwon, O.-K.; Ahn, K.-S.; Lee, J.; Kim, J.-C.; Byung-Sun Min, B.-S.; Joung, H. Isolation of coumarins and ferulate from the Roots of *Angelica purpuraefolia* and the antitumor activity of khellactone. *Phytother. Res.* **2007**, *21*, 406-409.
51. Mottaghipisheh, J.; Nove, M.; Spengler, G.; Kusz, N.; Hohmann, J.; Csupor, D. Antiproliferative and cytotoxic activities of furocoumarins of *Ducrosia anethifolia*. *Pharm. Biol.* **2018**, *56*, 658-664.



52. Widelski, J.; Luca, S.V.; Skiba, A.; Chinou, I.; Marcourt, L.; Wolfender, J.L.; Skalicka-Wozniak, K. Isolation and antimicrobial activity of coumarin derivatives from fruits of *Peucedanum luxurians* Tamamsch. *Molecules* **2018**, *23*, 1222.
